# Supplementary material
Source: Springer Nature journal article supplement (https://www.springermedizin.de/resource/supplementary/13054_2013_2519_MOESM1_ESM.pdf/9714208)
Supplement: MOESM1 [file 9714208]

118 patients screened

40 excluded  
18 ICU stay < 24h  
12 delirium screening  
could not be performed  
10 admitted because  
neurologic reason

78 enrolled

31 delirium

47 without  
delirium
